# Supplementary material for: Research on the Physio-Biochemical Mechanism of Non-Thermal Plasma-Regulated Seed Germination and Early Seedling Development in Arabidopsis
Source: Front Plant Sci. 2019 Nov 8;10:1322. doi: 10.3389/fpls.2019.01322 (PMC6857620; doi:10.3389/fpls.2019.01322)

**Electronic Supplementary Material for**

[**The Physio-biochemical Mechanism of Non-thermal Plasma-regulated Seed Germination and Early Seedling Development in *Arabidopsis***](http://xueshu.baidu.com/s?wd=paperuri%3A(413932b9c4d1ee52424048064d0cb040)&filter=sc_long_sign&sc_ks_para=q%3DThe GCR2 gene family is not required for ABA control of seed germination and early seedling development in Arabidopsis&sc_us=16360461045425754815&tn=SE_baiduxueshu_c1gjeupa&ie=utf-8)

**Dongjie Cui,1 Yue Yin,1 Jiaqi Wang,1 Hangbo Xu,1 Pengtao Yuan,2 Zhiwei Wang,3 Hongbin Ding,3 Ruonan Ma,1,*) and Zhen Jiao1,*)**

1Henan Key Laboratory of Ion-beam Bioengineering, College of Agricultural, Zhengzhou University, Zhengzhou, China, 450052

2School of Pharmacy, East China University of Science and Technology, Shanghai, China, 200237

3School of Physics, Key Laboratory of Materials Modification by Laser, Ion and Electron Beams, Ministry of Education, Dalian University of Technology, Dalian, China, 116024

*Co-Corresponding author: Ruonan Ma and Jiao Zhen.

E-mail address: [mrn19890324@aliyun.com](mailto:mrn19890324@aliyun.com) and [jiaozhen@zzu.edu.cn](mailto:jiaozhen@zzu.edu.cn).

**Supplementary material captions:**

**Supplemental Figure 1.** Effect of 10-min plasma treatment on the level of hydroxyl (A) and hydroxyl radical (B) in deionized water. (A: Attenuated total reflection-Fourier-transform infrared (ATR-FTIR) spectroscopy was used to detect hydroxyl groups produced by plasma irradiation; B: Terephthalic acid (TA) as a hydroxyl radical dosimeter was used to detect hydroxyl radicals produced by plasma irradiation.)

.

**Supplemental Figure 1.**


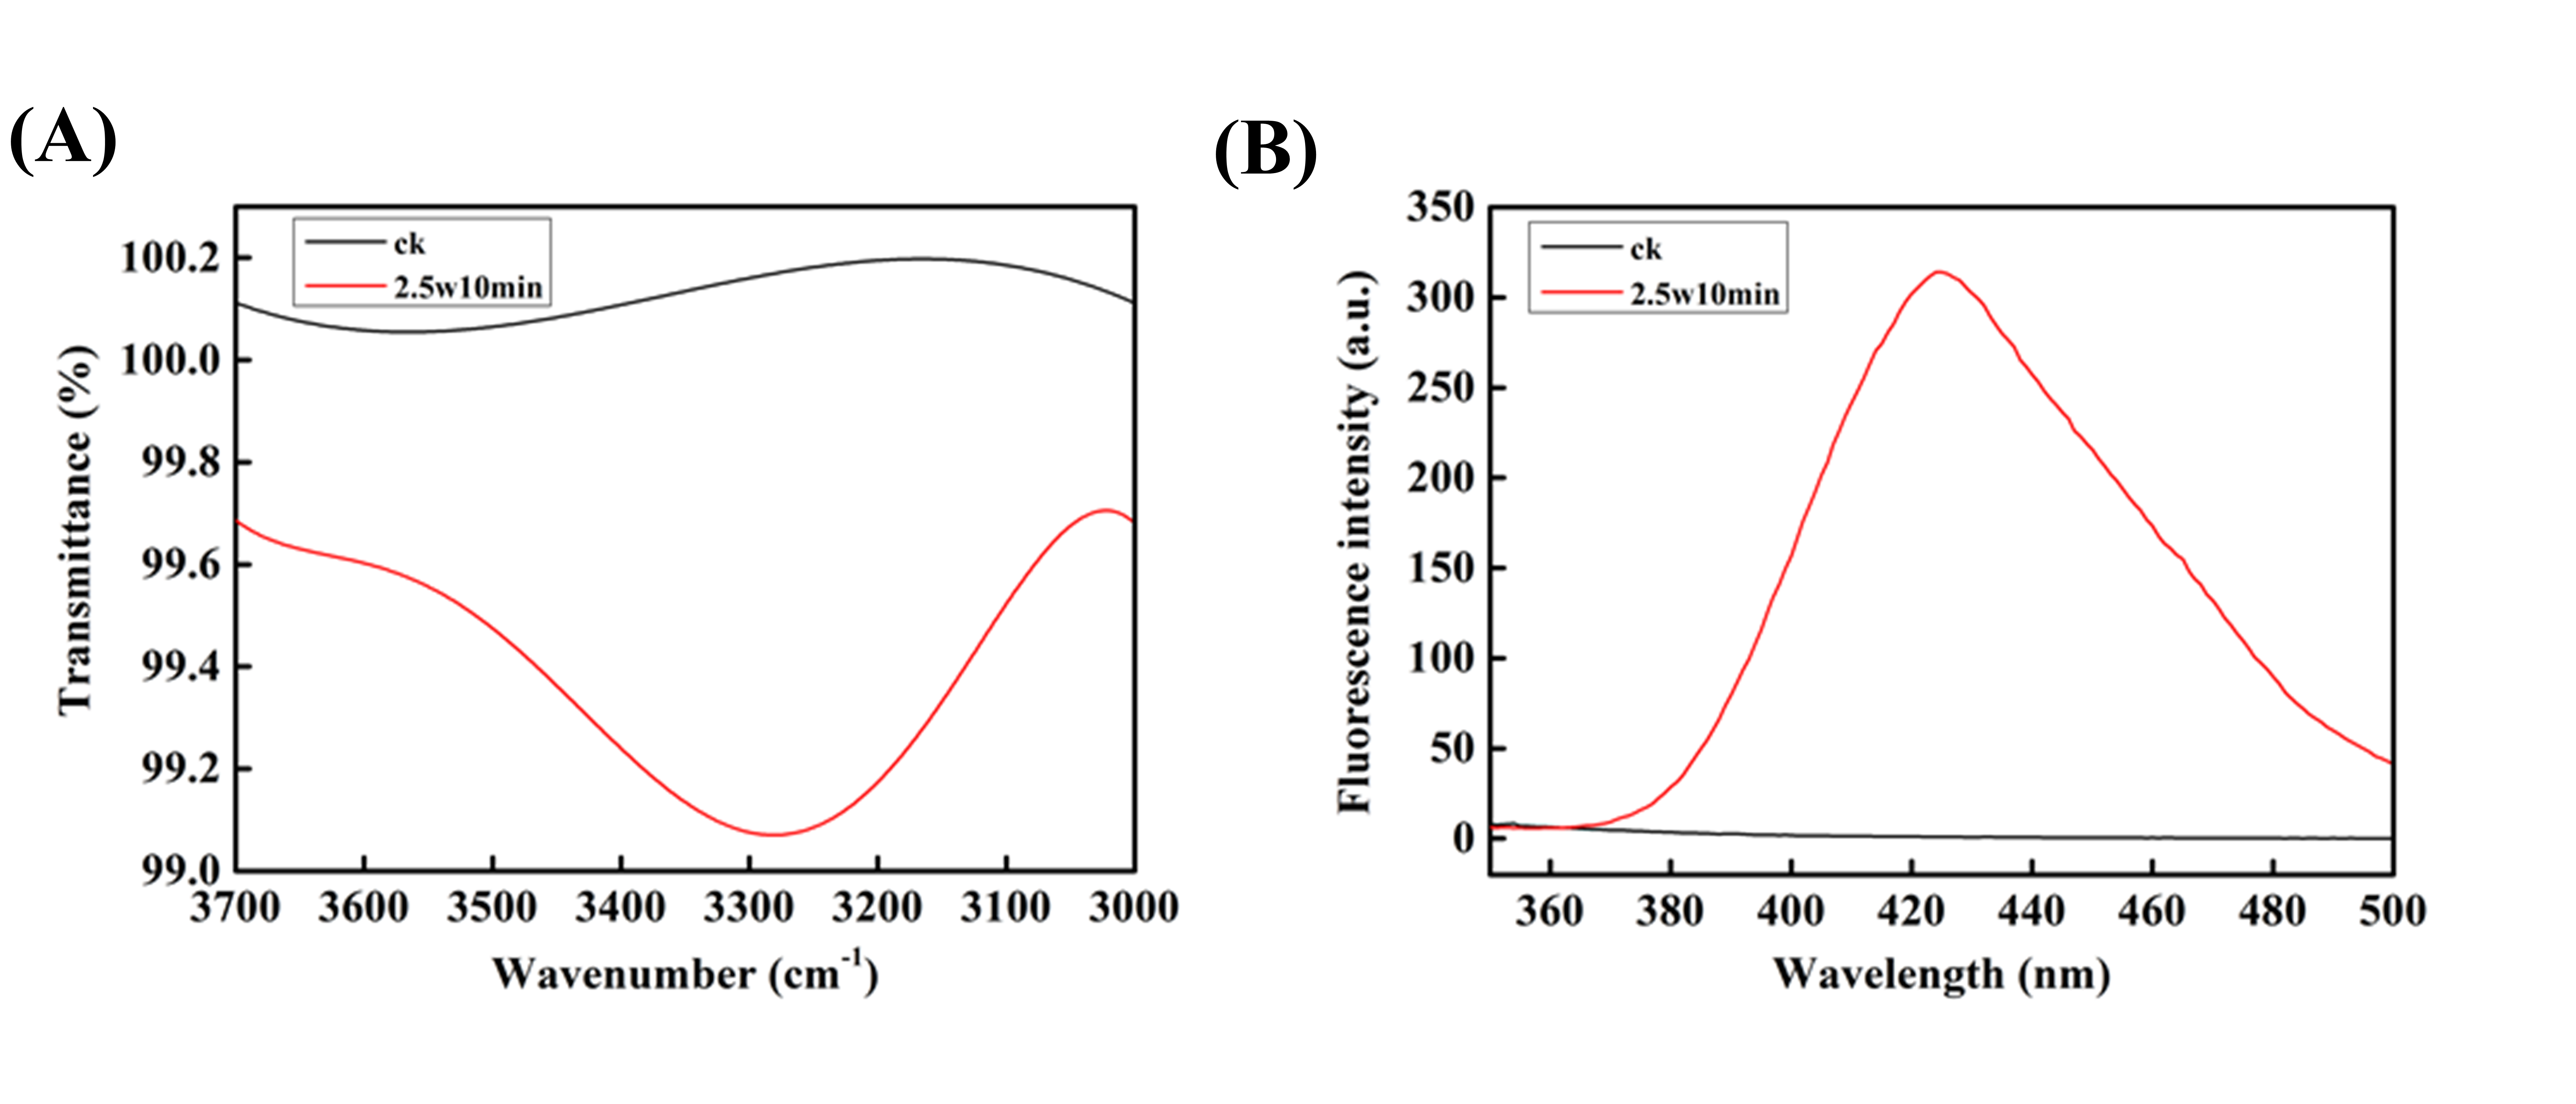

Supplement: Supplementary file 1 [file Table_1.doc]
